# Supplementary material for: Evaluation of the ecological niche model approach in spatial conservation prioritization
Source: PubMed Central journal article supplement (PMC6924678; doi:10.1371/journal.pone.0226971), 2019-12-20
Supplement: pone.0226971.s001.pdf [file pone.0226971.s001.pdf]

1 **S1 Supplemental Methods. Generating virtual community structure by using the**  
2 **ComGen package**

3 ComGen, a generator of a virtual community structure, is a collection of codes written in Perl. It  
4 generates a dataset of the presence and absence of multiple species at multiple sites. The output  
5 of ComGen is a two-dimensional matrix, the rows of which represent sites and the columns of  
6 which represent species. The elements of the matrix are either 1 (present) or 0 (absent) (Fig A).

7

|         | Species 1 | Species 2 | Species 3 | Species 4 | ... |
|---------|-----------|-----------|-----------|-----------|-----|
| Site 1  | 0         | 1         | 0         | 0         |     |
| Site 2  | 1         | 1         | 0         | 0         |     |
| Site 3  | 0         | 1         | 0         | 0         |     |
| Site 4  | 1         | 1         | 0         | 1         |     |
| Site 5  | 0         | 1         | 1         | 0         |     |
| Site 6  | 0         | 0         | 0         | 0         |     |
| Site 7  | 1         | 1         | 0         | 0         |     |
| Site 8  | 1         | 0         | 0         | 1         |     |
| Site 9  | 0         | 0         | 1         | 0         |     |
| Site 10 | 0         | 0         | 0         | 1         |     |
| ...     |           |           |           |           |     |

8 Fig A

9

10 The parameters controlling the pattern of the number of present sites among species, the  
11 species richness pattern among sites, and the environmental preferences of individual species  
12 can be manipulated. Before generating the dataset using ComGen, parameter values are set in  
13 sequence as follows, because these parameters are interrelated.

14 First, the number of sites is set. Sites are assumed to be arranged uniformly along a  
15 hypothetical environmental gradient, such as temperature.

16 Second, the total number of species and number of presence sites ( $N_p$ ) of individual species  
17 are set. By default, the plot of  $N_p$  of each species against the rank order of  $N_p$  of each species  
18 (i.e., a rank-abundance curve) is assumed to follow a log-linear pattern (Fig B). The variation of  
19  $N_p$  among species is controlled by manipulating the slope of the log-linear relationship. If  
20 necessary, the  $N_p$  of individual species can be chosen as desired.

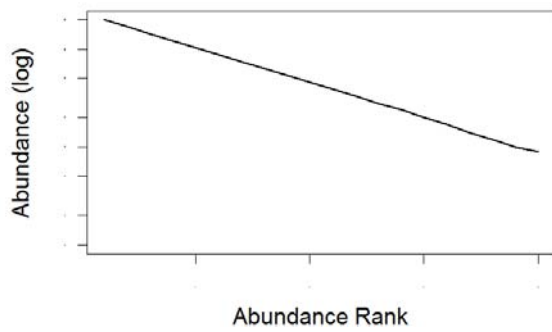

Fig B

21  
22  
23 Third, species richness (i.e., the number of species) at each site is determined. The species  
24 richness pattern among sites is assumed to follow a log-linear pattern (Fig C). The mean  
25 richness is adjusted so that the sum of the species richness over all the sites is equal to the sum  
26 of the  $N_p$  values of all species. The variation of species richness among sites is controlled by  
27 manipulating the slope of the log-linear relationship. Then the determined species richness is  
28 assigned to individual sites randomly, irrespective of the environmental conditions of the sites.

29

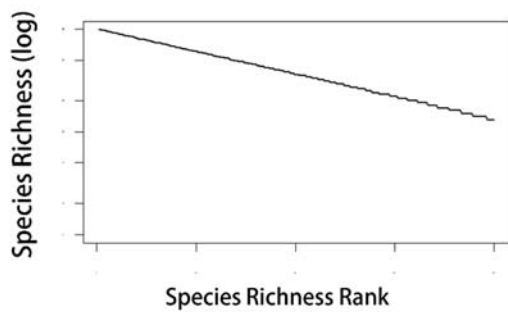

Fig C

30

31

32 Fourth, habitat preference (i.e., the range of suitable environments) is determined for each

33 species. The centers of the habitats of all species are located randomly over the entire

34 environmental gradient (Fig D). The width of the habitat preference of each species depends on

35 the number of presence sites of the species. More abundant species have wider habitat

36 preferences.

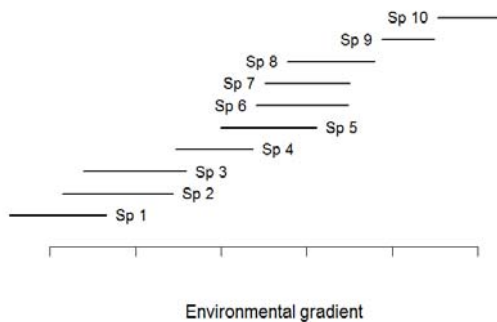

Fig D

37

38

39 Once the parameters are set, ComGen generates a presence/absence dataset. It first

40 generates a tentative distribution of each species by randomly assigning the predetermined

41 number of presence sites, considering the number of species present at each site, but without

42 considering the environmental preference of the species. Next, we adjust the random tentative

43 distribution to reflect the environmental preference of each species. We randomly select two  
44 sites, and a pair of species each of which is present in one of the two sites are swapped, if the  
45 swapping makes the distribution more consistent with the environmental preferences. This  
46 process is repeated until there is no more swapping to improve consistency with the  
47 environmental preferences. The richness pattern and rank-abundance curve are kept unchanged  
48 through the swapping process. Absence sites of each species are defined as the sites where the  
49 presence of the species is not assigned.

50 The distribution of each species is not necessarily confined to its potential habitat after the  
51 adjustment. There may be no solution satisfying all requirements if the values of parameters are  
52 incompatible. Thus, the generated dataset was checked for consistency with the environmental  
53 preference of each species by examining the ratio of presence data outside habitats and graphic  
54 expression of the distribution of individual species before conducting a conservation area  
55 selection analysis. There was no case in which the environmental preference of a species was  
56 violated in the parameter range we used in the analysis.

57

58

59
