# Supplementary material for: Evaluation of the ecological niche model approach in spatial conservation prioritization
Source: PubMed Central journal article supplement (PMC6924678; doi:10.1371/journal.pone.0226971), 2019-12-20
Supplement: pone.0226971.s002.pdf [file pone.0226971.s002.pdf]

**S1\_Table Settings of the ComGen package used to generate virtual community structures**

**for the analysis**

| <b>Setting ID</b>                     | <b>Community type 1</b><br>(Figs 2a,b and Fig. 3)                                       | <b>Community type 2</b><br>(Fig2 c,d and Fig. 4)                                            | <b>Community type 3</b><br>(Figs 2e,f and Fig. 5)             |
|---------------------------------------|-----------------------------------------------------------------------------------------|---------------------------------------------------------------------------------------------|---------------------------------------------------------------|
| <b>Number of grid cells</b>           | 1000                                                                                    | 1000                                                                                        | 1000                                                          |
| <b>Number of species</b>              | 1000                                                                                    | 1000                                                                                        | 1000                                                          |
| <b>Type of rank-abundance pattern</b> | log-linear (maximal abundance = 100, slope = 0.005)                                     | log-normal (mean = 3.0, SD = 0.8)                                                           | extracted from actual distribution data (freshwater mollusks) |
| <b>Type of richness pattern</b>       | log-linear (slope determined such that the ratio of maximum and minimum richness was 2) | log-linear (slope was determined such that the ratio of maximum and minimum richness was 2) | extracted from actual distribution data (freshwater mollusks) |
