# Supplementary material for: Evaluation of the ecological niche model approach in spatial conservation prioritization
Source: PubMed Central journal article supplement (PMC6924678; doi:10.1371/journal.pone.0226971), 2019-12-20
Supplement: pone.0226971.s003.pdf [file pone.0226971.s003.pdf]

1 S1 Figs. Performance of the ecological niche model (ENM) approach using GLM.

2

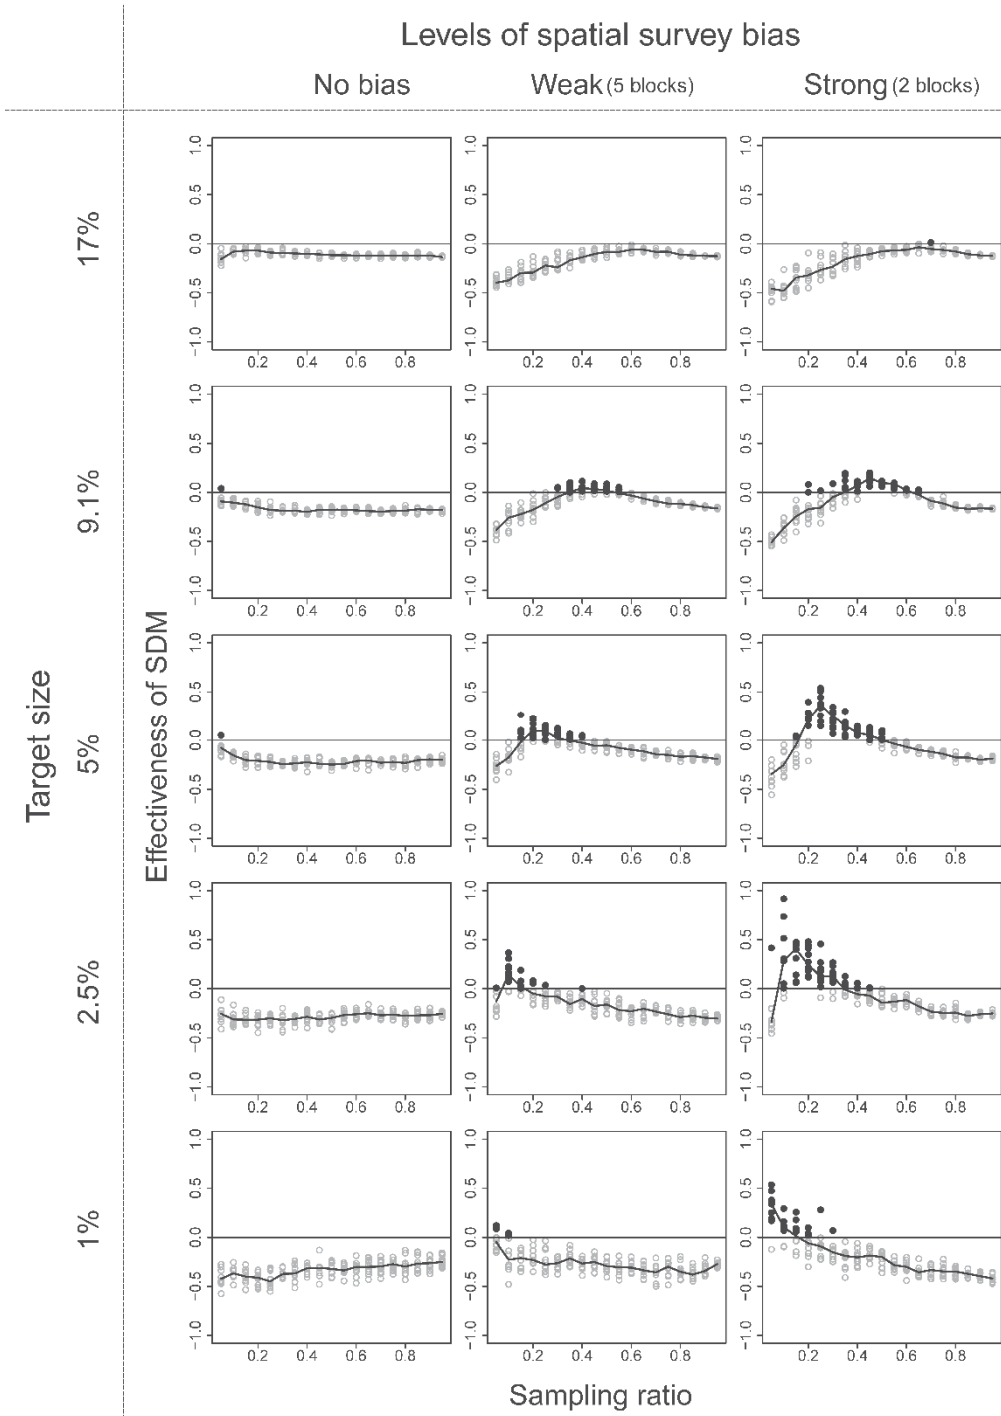

3

4 **Fig A** Performance of the ecological niche model (ENM) approach using GLM in the  
 5 community structure type 1 illustrated in Figs 2a and b. Black filled circles are values when the  
 6 SDM approach is beneficial, and gray open circles are the other case. Line chart shows  
 7 median value in each condition.

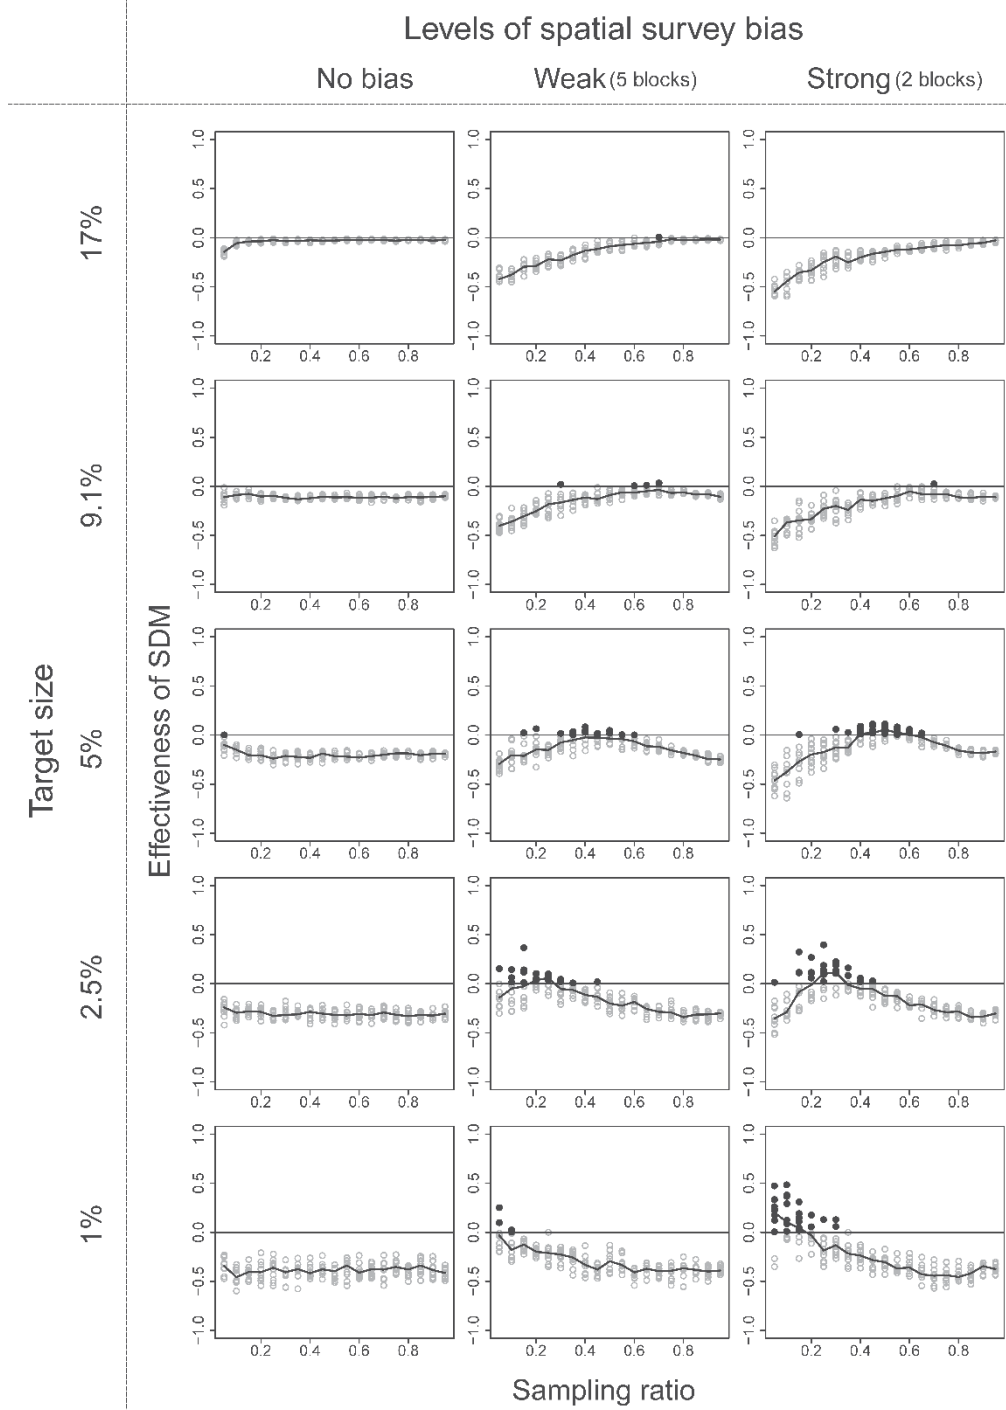

8  
9  
10  
11  
12

**Fig B** Performance of the ecological niche model (ENM) approach using GLM in the community structure type 2 illustrated in Figs 2c and d. See Fig A in S3 Figs for more details.

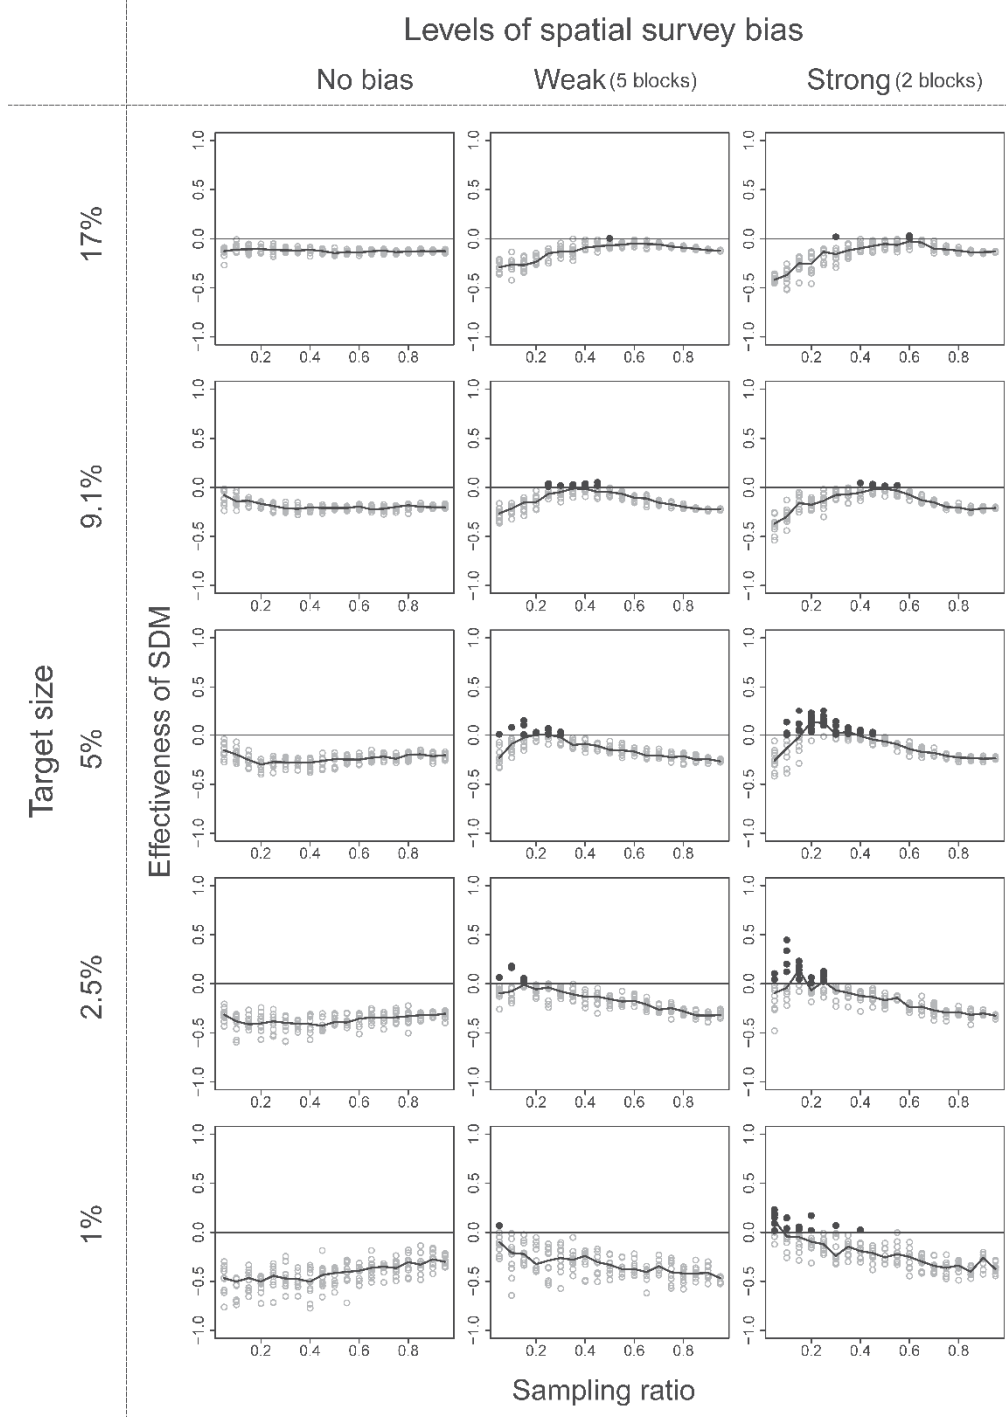

14

15

16 **Fig C** Performance of the ecological niche model (ENM) approach using GLM in the  
 17 community structure type 3 illustrated in Figs 2e and f. See Fig A in S3 Figs for more details.

18
