# Supplementary material for: Evaluation of the ecological niche model approach in spatial conservation prioritization
Source: PubMed Central journal article supplement (PMC6924678; doi:10.1371/journal.pone.0226971), 2019-12-20
Supplement: pone.0226971.s004.pdf [file pone.0226971.s004.pdf]

1 S2 Figs. Performance of the ecological niche model (ENM) approach using GAM.

2

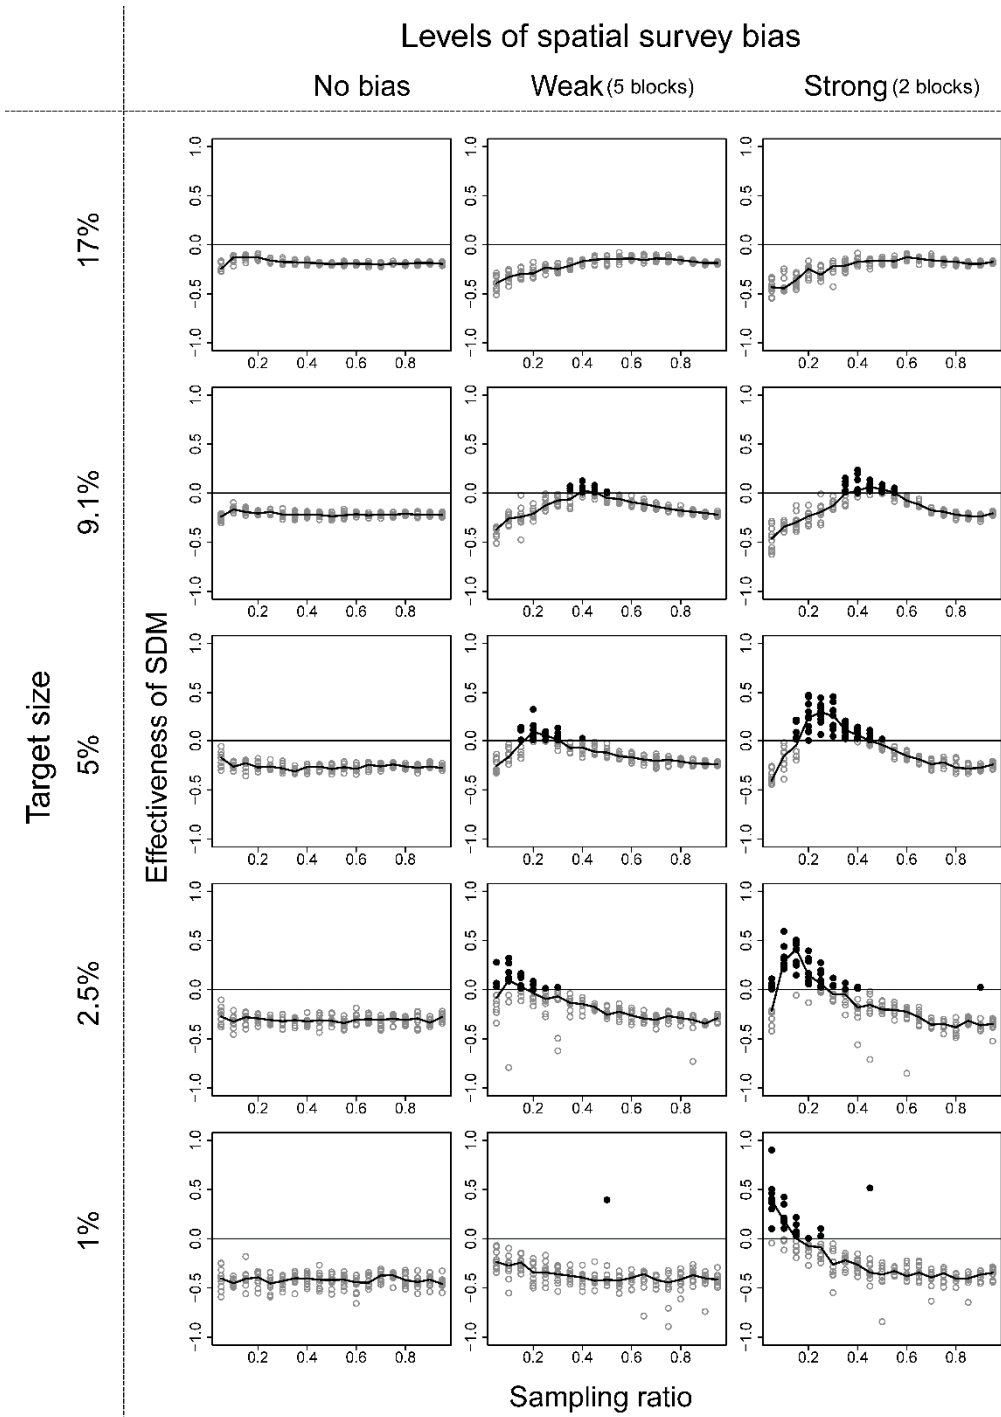

3

4

5 **Fig A** Performance of the ecological niche model (ENM) approach using GAM in the  
6 community structure type 1 illustrated in Figs 2a and b. Black filled circles are values when the  
7 SDM approach is beneficial, and gray open circles are the other case. Line chart shows  
8 median value in each condition.

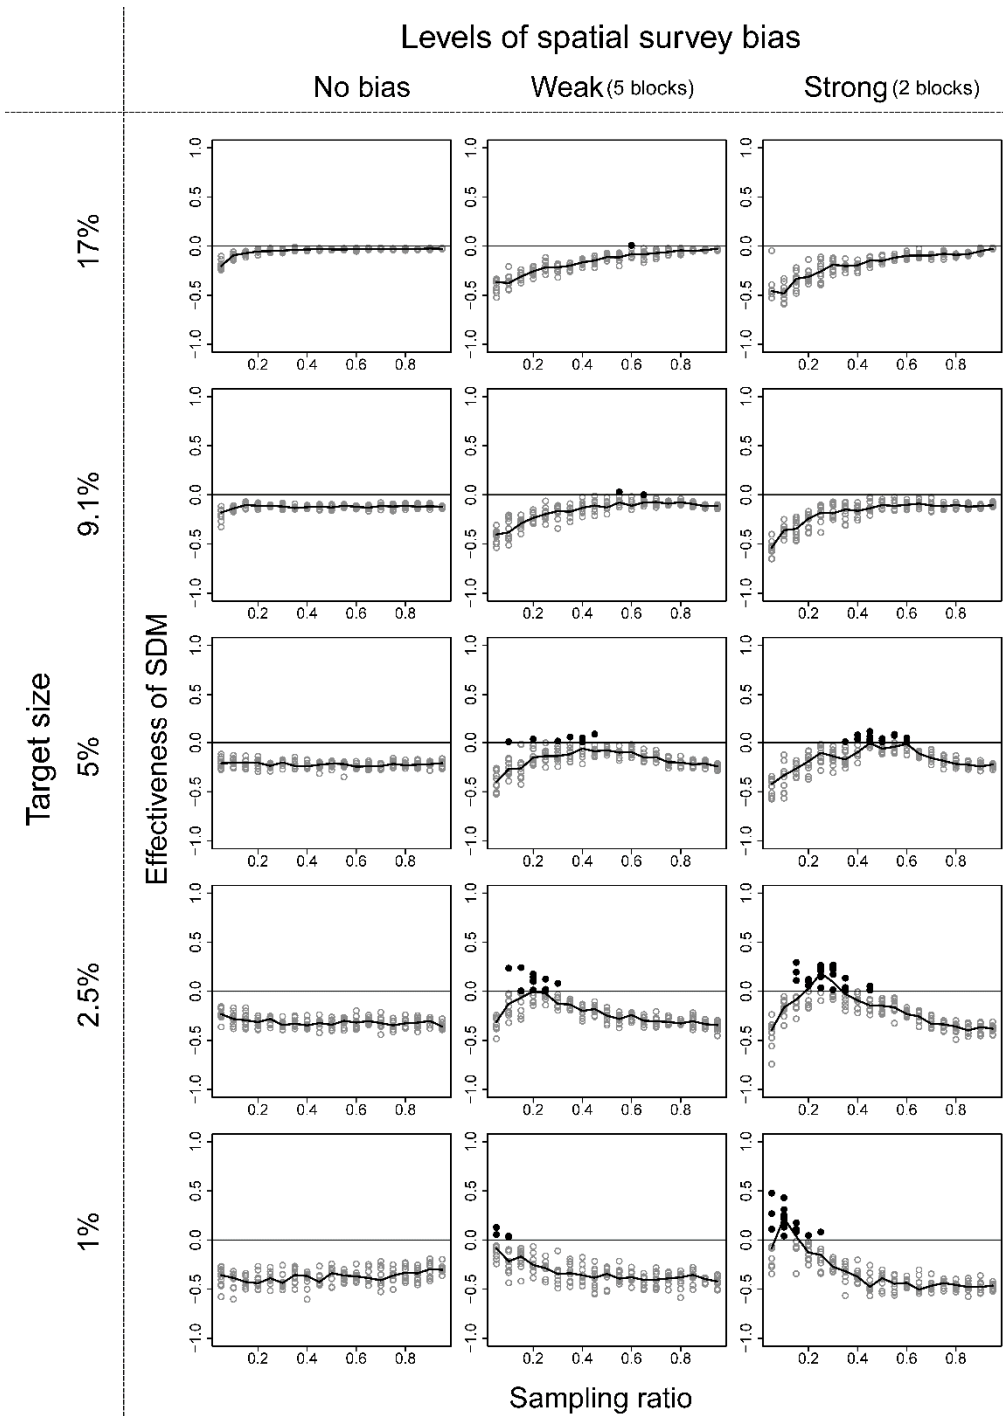

10

11

12 **Fig B** Performance of the ecological niche model (ENM) approach using GAM in the  
 13 community structure type 2 illustrated in Figs 2c and d. See Fig A in S3 Figs for more details.

14

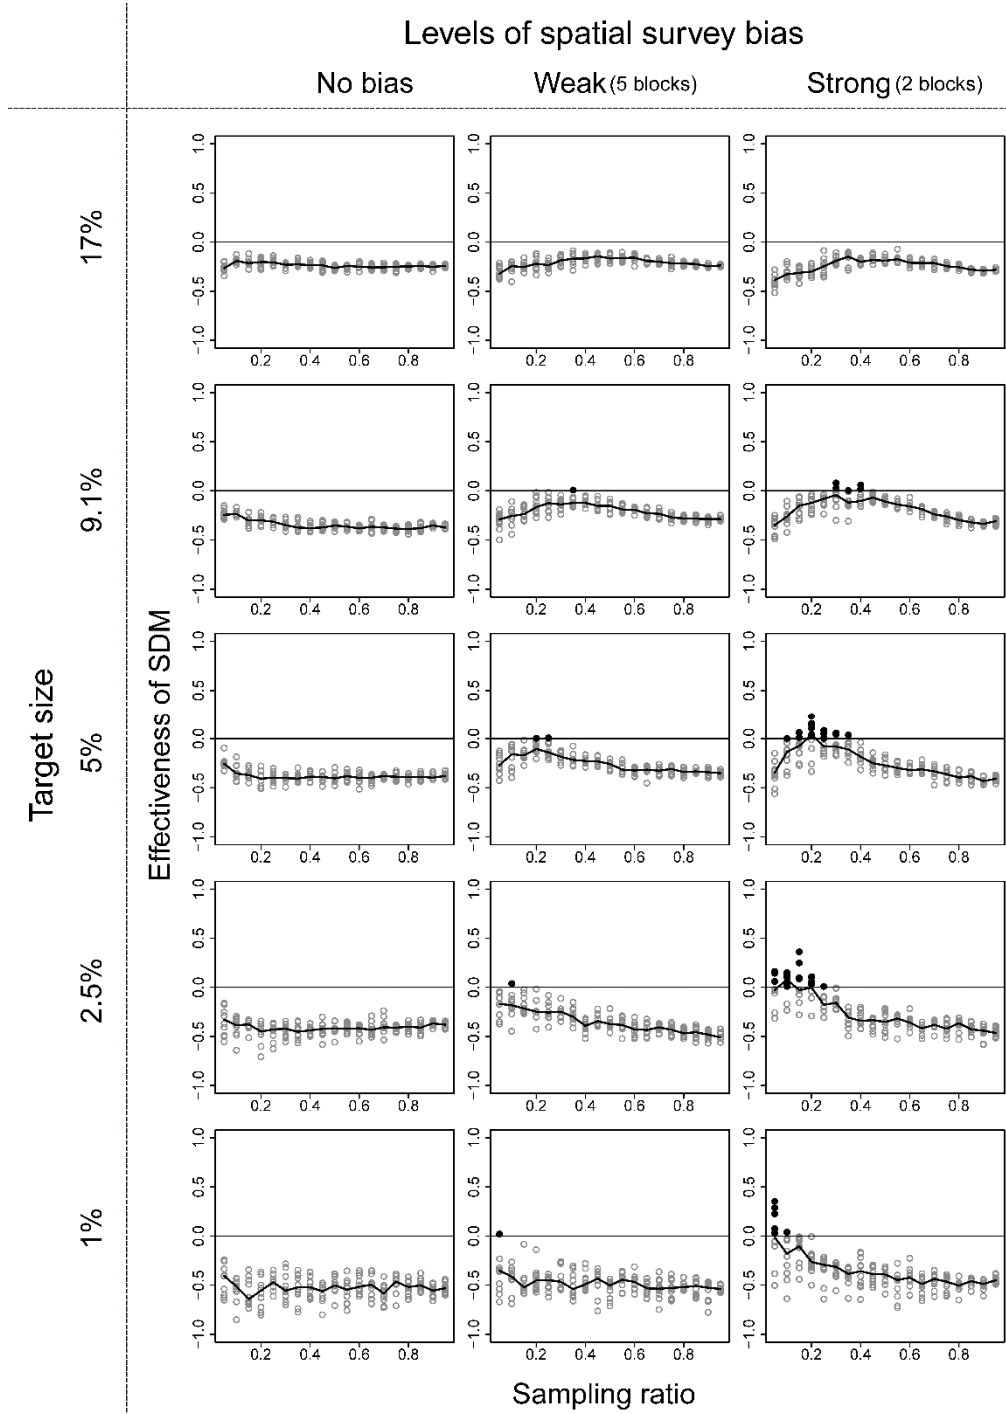

16

17

18 **Fig C** Performance of the ecological niche model (ENM) approach using GAM in the  
 19 community structure type 3 illustrated in Figs 2e and f. See Fig A in S3 Figs for more details.

20
