# Supplementary material for: Evaluation of the ecological niche model approach in spatial conservation prioritization
Source: PubMed Central journal article supplement (PMC6924678; doi:10.1371/journal.pone.0226971), 2019-12-20
Supplement: pone.0226971.s005.pdf [file pone.0226971.s005.pdf]

1 S3 Figs. The effectiveness of ENM approach using RF measured on the basis of the  
 2 number of rare species in the selected conservation area

3

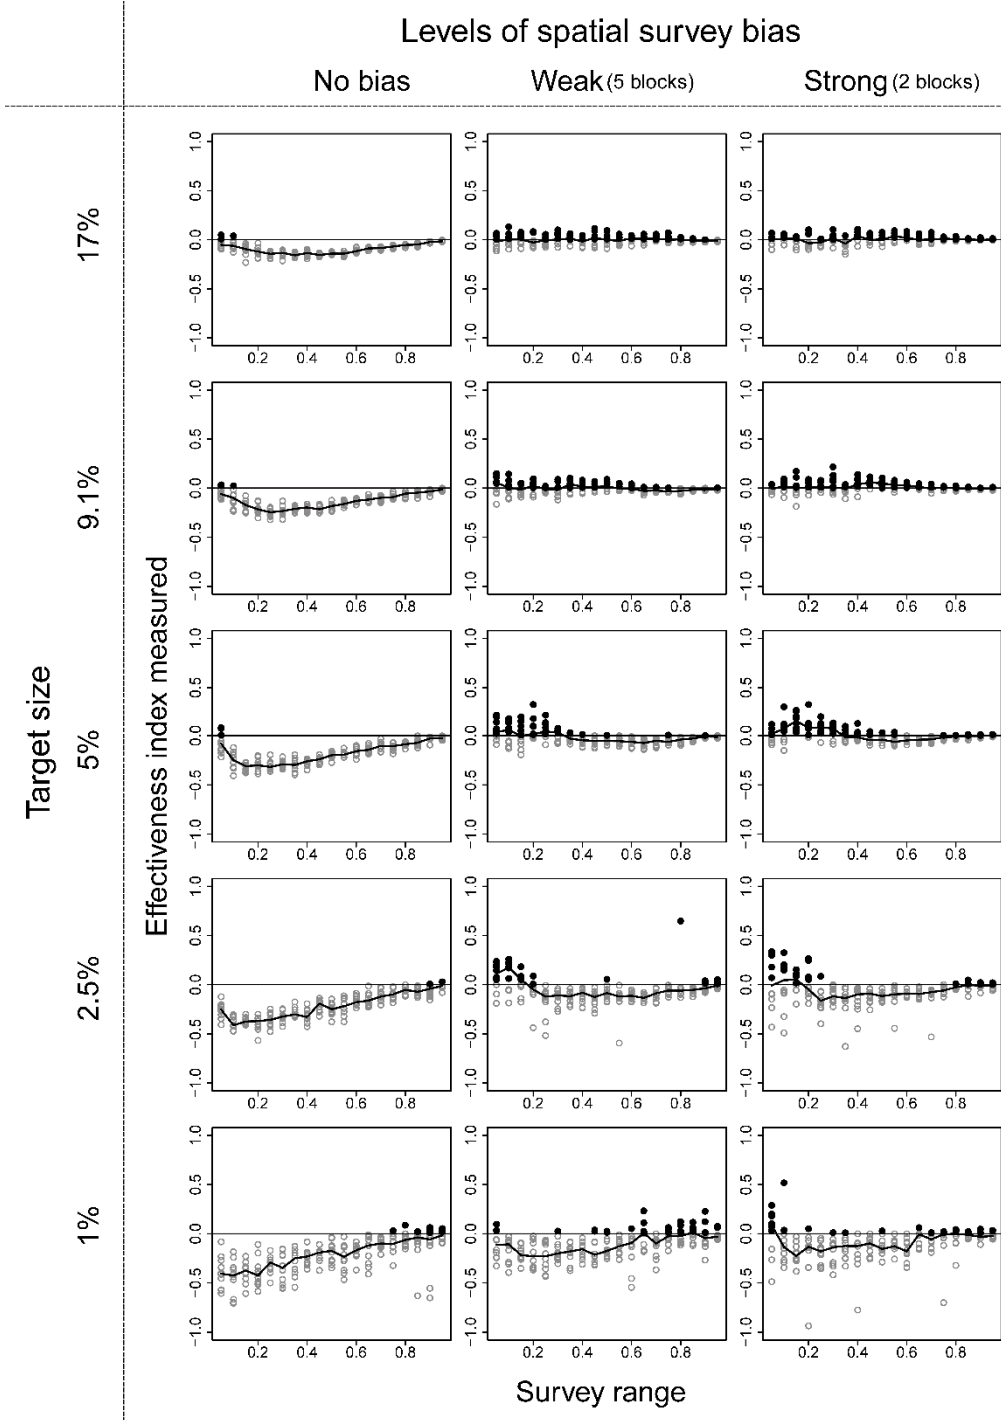

4

5 **Fig A** Performance of the ecological niche model (ENM) approach using RF measured on the  
 6 basis of the number of rare species in the community structure type 1 illustrated in Figs 2a and  
 7 b. Black filled circles are values when the ENM approach is beneficial, and gray open circles  
 8 are the other case. Line chart shows median value in each condition.

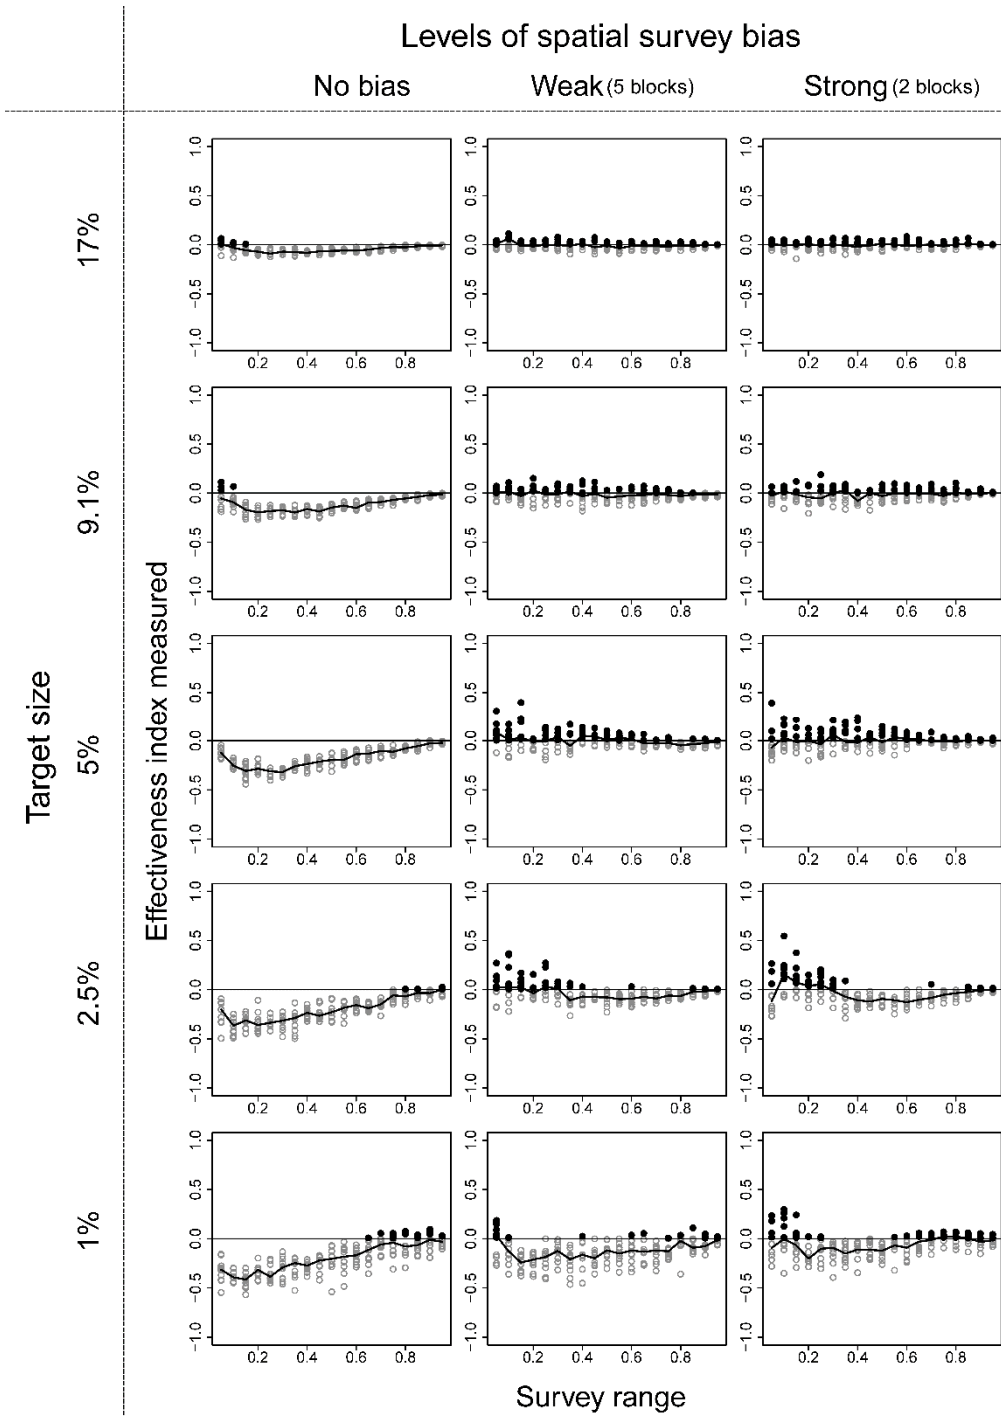

10  
11

12 **Fig B** Performance of the species distribution model (ENM) approach measured on the basis of  
 13 the number of rare species in the community structure type 2 illustrated in Figs 2c and d. See  
 14 Fig A in S5 Figs for more details.

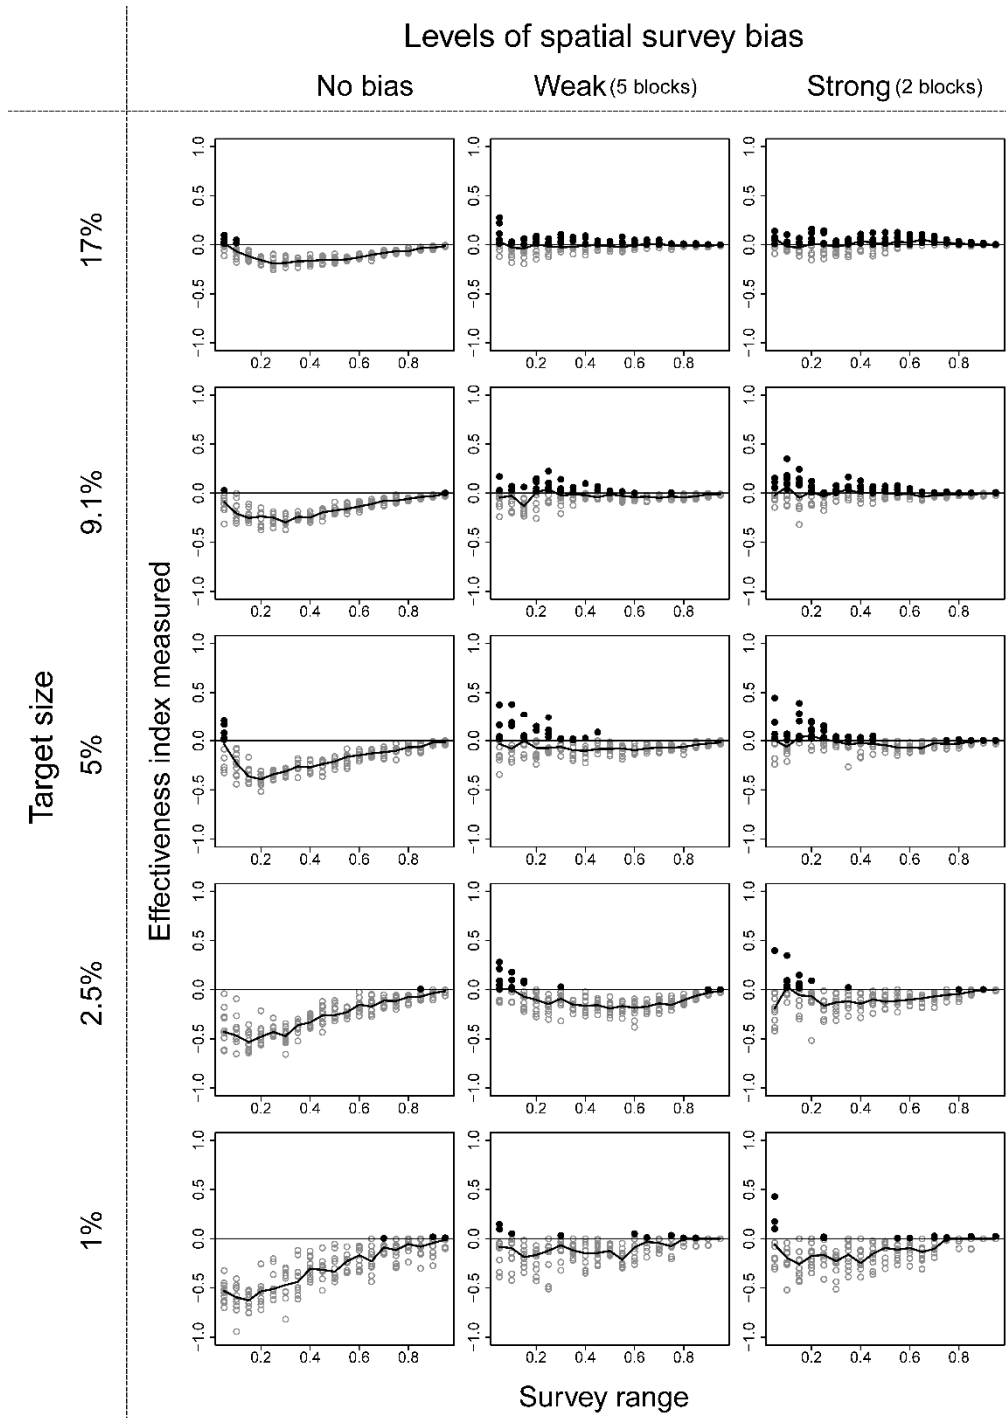

16  
17

18 **Fig C** Performance of the species distribution model (ENM) approach measured on the basis of  
 19 the number of rare species in the community structure type 3 illustrated in Figs 2e and f. See Fig  
 20 A in S5 Figs for more details.
