# Supplementary material for: Evaluation of the ecological niche model approach in spatial conservation prioritization
Source: PubMed Central journal article supplement (PMC6924678; doi:10.1371/journal.pone.0226971), 2019-12-20

## GLM

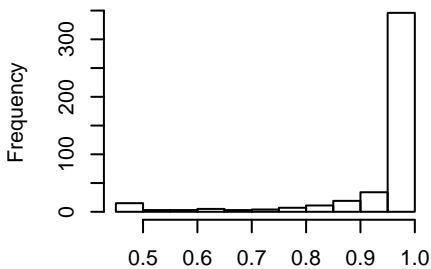

## GAM

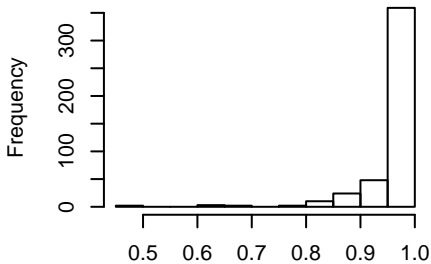

## Random Forest

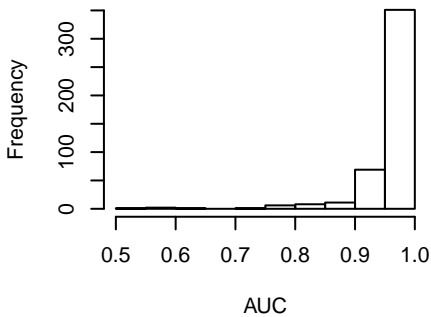

Supplement: pone.0226971.s006.pdf [file pone.0226971.s006.pdf]
